# Supplementary material for: Vulnerability in maternal, new-born, and child health in low- and middle-income countries: Findings from a scoping review
Source: PLOS journal article supplement (doi:10.1371/journal.pone.0276747), 2022-11-11
Supplement: S1 (10.1371/journal.pone.0276747.s001) [file journal.pone.0276747.s001]

**S1 Table: Characteristics of included studies on vulnerabilities in newborn and child health**

| Author & year              | Country                                                                       | Research method | Study design        | Study objectives                                                                                                                                                                                                                                                                                     |
|----------------------------|-------------------------------------------------------------------------------|-----------------|---------------------|------------------------------------------------------------------------------------------------------------------------------------------------------------------------------------------------------------------------------------------------------------------------------------------------------|
| Akseer 2019                | Afghanistan                                                                   | Quantitative    | Observational study | To evaluate associations of conflict severity with improvement of health system performance, use of health services, and child nutrition outcomes in Afghanistan during the 2003 to 2018 reconstruction period.                                                                                      |
| Ali Hirani 2014            | Pakistan                                                                      | Qualitative     | Literature review   | This paper reports on the issues, challenges and way forward of internally displaced children in disaster relief camps in Pakistan who are vulnerable in all aspects of their health i.e. mental, physical, social and spiritual.                                                                    |
| Andreani 2006              | Brazil                                                                        | Quantitative    | Observational study | To provide a panorama on premature birth and its repercussions in the familiar scope, showing the vulnerability of the baby in its physical and affective development, as well as the emotional crisis that the parents go through during this event, besides the alteration in the family dynamics. |
| Biemba 2013                | Mozambique                                                                    | Quantitative    | Observational study | To examine specifically the role of orphanhood and OVC status in predicting child outcome in health, education, access to food and nutritional status.                                                                                                                                               |
| Chiao (2020)               | Regions: Africa, Eastern Europe, Central Asia, South East Asia, Latin America | Quantitative    | Observational study | To investigate whether the presence of symptoms of acute respiratory infection (ARI) are contingent on environmental vulnerabilities such as the region, the level of ambient air pollution, community orphanhood status, and household poverty among young children under five.                     |
| Chiao 2017                 | Democratic Republic of Congo, Malawi and Nigeria                              | Quantitative    | Observational study | To examine the linkages between children's vulnerability and ARI symptoms, with a focus on the individual as well as community levels.                                                                                                                                                               |
| Davis 1996                 | Tanzania, Uganda and Democratic Republic of Congo                             | Quantitative    | Observational study | To compare the relative risk of death for young children with that for older children and adults under normal conditions and in emergency settings.                                                                                                                                                  |
| <sup>1</sup> Desclaux 2013 | Senegal                                                                       | Qualitative     | Observational study | To analyze the emergence of a situation of economic vulnerability generated by a public health policy that is nevertheless globally appropriate in terms of accessibility and epidemiological effectiveness.                                                                                         |
| Dogan 2009                 | Turkey                                                                        | Quantitative    | Observational study | To adapt and adopt practices that have been advised for pediatricians to prevent 'the vulnerable child syndrome', information is needed also on the prevalence and correlates of perceived vulnerability in children in LMICs.                                                                       |
| Drachler 2014              | Brazil                                                                        | Quantitative    | Observational study | To develop and validate of a Social Vulnerability Index (SVI) including five social determinants of risk to health and demonstrates its application in the financing of primary care by the Unified Health System (SUS) in the State of Rio Grande do Sul.                                           |
| Gaillard 2002              | Kenya                                                                         | Quantitative    | Observational study | To examine intervention study to reduce mother-to-child transmission of HIV in Mombasa, Kenya.                                                                                                                                                                                                       |
| Ghosh-Jerath 2013          | India                                                                         | Quantitative    | Observational study | To assess the nutritional status of Sahariya tribes of Madhya Pradesh (MP), India.                                                                                                                                                                                                                   |
| Huls 2020                  | South Africa                                                                  | Quantitative    | Observational study | To examine associations of exposure to indoor particulate matter with a 50% cut-off aerodynamic diameter of 10 µm (PM10) and maternal smoking with infant lung function and the role of gene-environment interactions.                                                                               |

| Author & year      | Country      | Research method       | Study design           | Study objectives                                                                                                                                                                                                                                                                                                                                       |
|--------------------|--------------|-----------------------|------------------------|--------------------------------------------------------------------------------------------------------------------------------------------------------------------------------------------------------------------------------------------------------------------------------------------------------------------------------------------------------|
| Johnson 2010       | Rwanda       | Quantitative          | Observational study    | To examine how the complex relationships between and within the proximate and socio-economic determinants mediate the poor health outcomes of children through their OVC status.                                                                                                                                                                       |
| Kalibala 2012      | Uganda       | Mixed-method research | –                      | To engage national stakeholders in a priority-setting exercise to develop a scoring system to assess dimensions of children's vulnerability.                                                                                                                                                                                                           |
| Kaye 2014          | Uganda       | Qualitative           | Observational study    | To gain an understanding of how obstetric complications affect the lives and livelihoods of survivors.                                                                                                                                                                                                                                                 |
| Lara-Valencia 2012 | Mexico       | Quantitative          | Observational study    | To explore the impact of contextual variables at the neighborhood level on a health marker in the city of Hermosillo, Mexico and discusses the importance of collaboration between planners and health professional to minimize the negative effect of contextual factors on urban health.                                                             |
| Lei 1999           | Brazil       | Quantitative          | Observational study    | To estimate the risk of linear growth retardation during the first two years of life as a result of household social vulnerability.                                                                                                                                                                                                                    |
| Mannan 2011        | Bangladesh   | Quantitative          | Observational study    | To assess the association of very severe disease (VSD) in newborns in rural communities with temperature, rainfall, and humidity.                                                                                                                                                                                                                      |
| Murray 2015        | Brazil       | Quantitative          | Observational study    | To test for sex differences in the association between fetal growth indices and attention problems at age four, in a large, prospective birth cohort from a middle-income country.                                                                                                                                                                     |
| Ncube 2016         | Botswana     | Qualitative           | –                      | To explore and describe the lived experiences of mothers regarding care of their hospitalized preterm infants in a neonatal unit in a public hospital in Gaborone, Botswana.                                                                                                                                                                           |
| Noorbakhsh 2019    | Iran         | Quantitative          | Observational study    | To assess the relation of serum level of zinc, and Vitamins A and D with UTI in children with proven UTI.                                                                                                                                                                                                                                              |
| Oliveira 2019      | Brazil       | Quantitative          | Observational study    | To verify the occurrence of the risk and protective factors for sudden infant death syndrome during nursing consultation.                                                                                                                                                                                                                              |
| Otani 2018         | Mongolia     | Quantitative          | Observational study    | To evaluate the health risks for children during the Dzud using various factors, including medical resources.                                                                                                                                                                                                                                          |
| Pedraza 2016       | Brazil       | Quantitative          | Observational study    | To evaluate the nutritional status of under-five-year-old children living in a locality intentionally studied because of its social vulnerability and association with personal and socioeconomic characteristics.                                                                                                                                     |
| Pollitt 1996       | Guatemala    | Quantitative          | Implementation science | To test whether the timing of these nutritional events partially determines the nature and scope of the adverse effects and examine whether the timing of the measurement of a functional outcome (e.g., attention) determines the magnitude of the cognitive delay observed. Timing, therefore, is considered for both the predictor and the outcome. |
| Sartorius 2010     | South Africa | Quantitative          | Observational study    | To assess changes in infant mortality patterns between 1992-2007 and to identify factors associated with infant mortality risk in the Agincourt sub-district, rural northeast South Africa.                                                                                                                                                            |
| Sartorius 2011     | South Africa | Quantitative          | Observational study    | To assess temporal changes in child mortality patterns within the study site between 1992 and 2007, and to produce all-cause and cause-specific mortality maps to identify high risk                                                                                                                                                                   |

| Author & year             | Country                                                                                                | Research method | Study design           | Study objectives                                                                                                                                                                                                                                                                                                                                 |
|---------------------------|--------------------------------------------------------------------------------------------------------|-----------------|------------------------|--------------------------------------------------------------------------------------------------------------------------------------------------------------------------------------------------------------------------------------------------------------------------------------------------------------------------------------------------|
|                           |                                                                                                        |                 |                        | areas.                                                                                                                                                                                                                                                                                                                                           |
| Seidel 2000               | South Africa                                                                                           | –               | Observational study    | To study the experiences of breastfeeding and vulnerability among a group of HIV-positive women in Durban, South Africa.                                                                                                                                                                                                                         |
| Siekman 2014              | Ghana, Malawi and Tanzania                                                                             | Quantitative    | Implementation science | To estimate the association between hemoglobin and immediate, underlying and basic causes of child anemia and variation in this association between years.                                                                                                                                                                                       |
| <sup>1</sup> Sochas 2017  | Sierra Leone                                                                                           | Quantitative    | Observational study    | To quantify the extent of the drop in utilization of essential reproductive, maternal and neonatal health services in Sierra Leone during the Ebola outbreak by using interrupted time-series regression to analyze Health Management Information System (HMIS) data.                                                                            |
| Thorne-Lyman 2018         | Nepal                                                                                                  | Quantitative    | Observational study    | (1) Assess the change in prevalence of child stunting and wasting in a post hoc sample of areas classified by the government as “earthquake-affected” from 2014 to 2016; (2) Examine in greater detail the shocks experienced by households, potential risk factors for malnutrition, and indicators of household resilience in the same sample. |
| Tudge 2013                | Kenya and Brazil                                                                                       | Qualitative     | Observational study    | To compare heterogeneity of young children’s vulnerability experiences in Kenya and Brazil.                                                                                                                                                                                                                                                      |
| <sup>1</sup> Ventura 2008 | Brazil                                                                                                 | Quantitative    | Observational study    | To investigate vulnerability and the consequent differences in access to health services and occurrences of deaths among infants under one year of age in the municipality of Embu.                                                                                                                                                              |
| Wang 2019                 | China                                                                                                  | Quantitative    | Observational study    | To explore child neglect among preschool children in rural China and examine its association with social living ability                                                                                                                                                                                                                          |
| Winch 2005                | Bangladesh                                                                                             | Qualitative     | Observational study    | To describe the organization of the neonatal period in Sylhet District, Bangladesh, the perceived threats to the well-being of neonates, and the ways in which families seek to protect them.                                                                                                                                                    |
| Worku 2017                | Ethiopia                                                                                               | Quantitative    | Observational study    | To investigate the developmental performances of children between 3.5 and 71.8 months of age living in the SOS village of Jimma compared to age- and sex-matched family-reared children and to compare the social and emotional behavior of SOS to the family-reared children.                                                                   |
| Yuan 2020                 | Guinea-Bissau, Guinea, Sierra Leone, Liberia, Cote d’Ivoire, Ghana, Togo, Benin, Nigeria, and Cameroon | Quantitative    | Observational study    | To identify which factor of social vulnerability predominantly affects infant mortality.                                                                                                                                                                                                                                                         |
| Yusuf 2010                | Nigeria                                                                                                | Quantitative    | Observational study    | To investigate the relationship between the prevalence of childhood fever and socioeconomic factors including poverty in Nigeria, and to examine these effects at the regional levels.                                                                                                                                                           |
| Zakayo 2020               | Kenya                                                                                                  | Qualitative     | Observational study    | To examine vulnerability and agency across treatment-seeking journeys for acutely ill children and considered the implications for policy and practice.                                                                                                                                                                                          |

<sup>1</sup> Study focused on vulnerability in maternal and child health.
